# Supplementary material for: Hydrogen and oxygen isotopes in vertebrate tissues vary by diet type
Source: Frontiers journal article supplement (doi:10.3389/fevo.2025.1516786), 2025-02-18
Supplement: Table_1.xlsx [file Table_1.xlsx]

## Sheet: T1.weights
sample name	animal	diet	starting weight (g)	final weight (g)	note		SUMMARY	STARTING WEIGHTS		FINAL WEIGHTS
1ARA4B1	rat	insect	217	266				mean (g)	1 sd	mean (g)	1 sd	n
1ARA4B2	rat	insect	198	261			rat all diets	197.833	12.571	244.778	17.1997	18
1ARA4G1	rat	insect	204	252			rat insect diet	204.667	12.2257	254.167	12.8284	6
1ARA4G2	rat	insect	184	230			rat meat diet	193.333	14.2642	248	19.2146	6
1ARA4R2	rat	insect	213	255			rat plant diet	195.5	10.6207	232.167	14.2373	6
1ARA4R1	rat	insect	212	261	dentine sample only
1ARA5B1	rat	meat	209	274			quail all diets	253.294	23.4141	289.941	24.3579	17
1ARA5B2	rat	meat	185	236			quail insect diet	246.333	32.8796	287.667	23.3209	6
1ARA5G1	rat	meat	193	232			quail meat diet	249.167	16.0924	297	33.1783	6
1ARA5G2	rat	meat	198	251			quail plant diet	266.6	14.0819	284.2	13.9176	5
1ARA5R1	rat	meat	170	228
1ARA5R2	rat	meat	205	267			guinea pig all diets	400.625	16.3049	577	104.167	16
1ARB1B1	rat	plant	190	234			guinea pig insect diet	394.2	17.7679	637	33.219	5
1ARB1B2	rat	plant	184	211			guinea pig meat diet	398.4	17.1988	452.8	73.5473	5
1ARB1G1	rat	plant	205	243			guinea pig plant diet	407.833	14.1339	630.5	69.8677	6
1ARB1G2	rat	plant	210	246
1ARB1R1	rat	plant	192	225
1ARB1R2	rat	plant	192	234	dentine sample only
1AQA4B1	quail	insect	292	302
1AQA4B2	quail	insect	255	287
1AQA4G1	quail	insect	237	280
1AQA4G2	quail	insect	194	247
1AQA4R1	quail	insect	236	295
1AQA4R2	quail	insect	264	315
1AQA5B1	quail	meat	244	284
1AQA5B2	quail	meat	232	262
1AQA5G1	quail	meat	230	278
1AQA5G2	quail	meat	259	287
1AQA5R1	quail	meat	263	317
1AQA5R2	quail	meat	267	354
1AQB1B2	quail	plant	269	273
1AQB1G1	quail	plant	271	288
1AQB1G2	quail	plant	277	270
1AQB1R1	quail	plant	242	285
1AQB1R2	quail	plant	274	305
1AGB3B1	guinea pig	insect	367	665
1AGB3B2	guinea pig	insect	408	661
1AGB3G1	guinea pig	insect	386	582
1AGB3G2	guinea pig	insect	409	642
1AGC3R1	guinea pig	insect	401	635
1AGC2B1	guinea pig	meat	388	573
1AGB6G1	guinea pig	meat	393	399
1AGB6G2	guinea pig	meat	379	462
1AGB2R1	guinea pig	meat	411	389
1AGC2R2	guinea pig	meat	421	441
1AGB1B1	guinea pig	plant	399	760
1AGB1B2	guinea pig	plant	415	615	dentine sample only
1AGB1G1	guinea pig	plant	384	587
1AGB1G2	guinea pig	plant	410	645
1AGC1R1	guinea pig	plant	416	559
1AGC1R2	guinea pig	plant	423	617

## Sheet: T2.tissues
sample name	tissue	diet	animal	18O-enriched drinking water	δ18O (‰)	δ18O (‰) SD	δ2Hn -Cr (‰)	δ2Hn-Cr (‰) computed	Δδ2H non-lipid (‰)	Δδ2H whole (‰)	Δδ18O non-lipid (‰)	Δδ18O whole (‰)	δ2H -glassy C (‰)	δ2H -glassy C SD (‰)	fex	weight % H	weight % H SD
1AGB3B1	muscle	insect	guinea pig		10.2		-96.5		-19.4	-1.7	-13.6	-13.5	-109.4		0.07	6.33	0.03
1AGB3B2	muscle	insect	guinea pig		9.7	0.2	-99		-21.9	-4.2	-14.1	-14	-109.8	0	0.07	6.32	0.04
1AGB3G1	muscle	insect	guinea pig		10	0	-98.2		-21.1	-3.4	-13.8	-13.7	-109.1	0.9	0.06	6.29	0.05
1AGB3G2	muscle	insect	guinea pig		9.6		-97.2		-20.1	-2.4	-14.2	-14.1	-107.3		0.06	6.33	0.02
1AGC3R1	muscle	insect	guinea pig		10	0.1	-95.8		-18.7	-1	-13.8	-13.7	-107.6	0.9	0.07	6.26	0.02
1AQA4B1	muscle	insect	quail		9.6	0.1	-101.1		-24	-6.3	-14.2	-14.1	-111	1.6	0.07	6.38	0.03
1AQA4G1	muscle	insect	quail		9.4		-98.4		-21.3	-3.6	-14.4	-14.3	-113.6		0.07	6.21	0.23
1AQA4R2	muscle	insect	quail		9.4	0.1	-99.5		-22.4	-4.7	-14.4	-14.3	-110.3	0.9	0.07	6.4	0.01
1AQA4B2	muscle	insect	quail	yes	13.2		-102.3		-25.2	-7.5	-10.6	-10.5	-110.5		0.06	6.45	0.01
1AQA4G2	muscle	insect	quail	yes	13.4	0.1	-100.9		-23.8	-6.1	-10.4	-10.3	-110.1	0.5	0.07	6.25	0.03
1AQA4R1	muscle	insect	quail	yes	13.1	0.1	-100.6		-23.5	-5.8	-10.7	-10.6	-112	0	0.07	6.44	0.04
1ARA4B1	muscle	insect	rat		10	0.1	-95.4		-18.3	-0.6	-13.8	-13.7	-108.5	1.2	0.07	6.42	0.03
1ARA4B2	muscle	insect	rat		10.4	0.2	-95.4		-18.3	-0.6	-13.4	-13.3	-108	0.3	0.07	6.27	0.15
1ARA4G1	muscle	insect	rat		10.3	0.2	-97.5		-20.4	-2.7	-13.5	-13.4	-109.2	0.1	0.05	6.22	0.12
1ARA4G2	muscle	insect	rat		10.2		-96.3		-19.2	-1.5	-13.6	-13.5	-109		0.07	6.37	0.06
1ARA4R2	muscle	insect	rat		10.1	0	-96.3		-19.2	-1.5	-13.7	-13.6	-108.3	0.2	0.08	6.37	0.01
1AGB2R1	muscle	meat	guinea pig		9.4		-102.3		-27.3	-12.4	-13.7	-13.8	-113.6		0.07	6.32	0.03
1AGB6G1	muscle	meat	guinea pig		8.8		-106.1		-31.1	-16.2	-14.3	-14.4	-114.2		0.06	6.25	0.04
1AGB6G2	muscle	meat	guinea pig		8.7		-104.2		-29.2	-14.3	-14.4	-14.5	-115.4		0.06	6.38	0.02
1AGC2B1	muscle	meat	guinea pig		10.2	0.2	-102.7		-27.7	-12.8	-12.9	-13	-113.1	0.9	0.07	6.11	0.2
1AGC2R2	muscle	meat	guinea pig		8.6		-101.2		-26.2	-11.3	-14.5	-14.6	-112.9		0.06	6.31	0.01
1AQA5B1	muscle	meat	quail		8.7		-107.1		-32.1	-17.2	-14.4	-14.5	-115.4		0.08	6.51	0.01
1AQA5G2	muscle	meat	quail		8.1		-106.9		-31.9	-17	-15	-15.1	-115.3		0.07	6.5	0.06
1AQA5R2	muscle	meat	quail		8.9	0.2	-103.7		-28.7	-13.8	-14.2	-14.3	-113.4	0.6	0.06	6.49	0.01
1AQA5B2	muscle	meat	quail	yes	13.1		-104.3		-29.3	-14.4	-10	-10.1	-116.7		0.07	6.42	0.06
1AQA5G1	muscle	meat	quail	yes	12.9	0	-104.7		-29.7	-14.8	-10.2	-10.3	-116.4	0.1	0.07	6.4	0.06
1AQA5R1	muscle	meat	quail	yes	13.1		-105.6		-30.6	-15.7	-10	-10.1	-115.7		0.07	6.45	0.01
1ARA5B1	muscle	meat	rat		10		-103.9		-28.9	-14	-13.1	-13.2	-112.5		0.04	6.69	0.3
1ARA5B2	muscle	meat	rat		10.2	0.2	-101.4		-26.4	-11.5	-12.9	-13	-113.2	0.7	0.07	6.39	0.02
1ARA5G1	muscle	meat	rat		10.3167	0.396071	-98.7		-23.7	-8.8	-12.8	-12.9	-110.5	0.3	0.07	6.2	0.04
1ARA5G2	muscle	meat	rat		10.3		-99.4		-24.4	-9.5	-12.8	-12.9	-110.9		0.07	6.28	0.03
1ARA5R1	muscle	meat	rat		9.8	0.1	-98.4		-23.4	-8.5	-13.3	-13.4	-109.5	0.4	0.07	6.29	0.06
1ARA5R2	muscle	meat	rat		9.8	0.1	-99.8		-24.8	-9.9	-13.3	-13.4	-111.6	0.2	0.07	6.36	0.04
1AGB1B1	muscle	plant	guinea pig		9.2		-113.1		-17.1	-9.1	-12.6	-12.8	-123		0.06	6.23	0.15
1AGB1G1	muscle	plant	guinea pig		9.9		-113.2		-17.2	-9.2	-11.9	-12.1	-122.9		0.07	6.32	0.01
1AGB1G2	muscle	plant	guinea pig		9.2		-111.7		-15.7	-7.7	-12.6	-12.8	-121.8		0.07	6.3	0.01
1AGC1R1	muscle	plant	guinea pig		9.6		-111.9		-15.9	-7.9	-12.2	-12.4	-119.7		0.07	6.14	0.06
1AGC1R2	muscle	plant	guinea pig		9.5		-112.4		-16.4	-8.4	-12.3	-12.5	-120		0.06	6.3	0.01
1AQB1G1	muscle	plant	quail		9.7	0	-114.7		-18.7	-10.7	-12.1	-12.3	-122.2	0.7	0.07	6.31	0.02
1AQB1G2	muscle	plant	quail		8.8	0	-112.2		-16.2	-8.2	-13	-13.2	-121	1.2	0.06	6.36	0
1AQB1R1	muscle	plant	quail		9.2	0	-111.6		-15.6	-7.6	-12.6	-12.8	-122.9	0.5	0.06	6.34	0.01
1AQB1B2	muscle	plant	quail	yes	13		-112.2		-16.2	-8.2	-8.8	-9	-120.4		0.07	6.33	0.07
1AQB1R2	muscle	plant	quail	yes	13.1	0.1	-112.9		-16.9	-8.9	-8.7	-8.9	-126.2	3.3	0.07	6.31	0.04
1ARB1B1	muscle	plant	rat		10.3		-107.4		-11.4	-3.4	-11.5	-11.7	-115.1		0.07	6.38	0.02
1ARB1B2	muscle	plant	rat		10.2	0.2	-104.5		-8.5	-0.5	-11.6	-11.8	-117.5	0.3	0.07	6.32	0.04
1ARB1G1	muscle	plant	rat		10.6		-103.5		-7.5	0.5	-11.2	-11.4	-114.5		0.06	6.32
1ARB1G2	muscle	plant	rat		10.3	0.1	-106		-10	-2	-11.5	-11.7	-118.3	1	0.07	6.29	0.02
1ARB1R1	muscle	plant	rat		10.2	0.1	-105.8		-9.8	-1.8	-11.6	-11.8	-118.2	0.3	0.07	6.26	0.03
1AGB3B2	dentine	insect	guinea pig				-45.9		31.2	48.9					0.05	6.32	0.04
1AGB3G1	dentine	insect	guinea pig				-38.8		38.3	56					0.03	6.38	0.06
1AGC3R1	dentine	insect	guinea pig		6.6		-42.4		34.7	52.4	-17.2	-17.1	-48.7		0.03	6.42	0.1
1ARA4B1	dentine	insect	rat				-26.2		50.9	68.6					0.05	6.22	0.03
1ARA4R1	dentine	insect	rat				-32		45.1	62.8					0.03	6.13	0.06
1AGB6G1	dentine	meat	guinea pig		5.2		-66		9	23.9	-17.9	-18	-78		0.04	6.35	0.04
1AGB6G2	dentine	meat	guinea pig				-61.8		13.2	28.1					0.04	6.32	0.01
1AGC2B1	dentine	meat	guinea pig		5.5		-53.7		21.3	36.2	-17.6	-17.7	-68.1		0.04	6.29	0.02
1AGC2R2	dentine	meat	guinea pig				-73.4		1.6	16.5					0.06	6.43	0.05
1ARA5B2	dentine	meat	rat				-35.8		39.2	54.1					0.04	6.24	0
1ARA5G1	dentine	meat	rat		5.6			-48	27	41.9	-17.5	-17.6	-58.4
1ARA5G2	dentine	meat	rat		6.1			-35.7	39.3	54.2	-17	-17.1	-46.1
1ARA5R1	dentine	meat	rat		6.1			-40.6	34.4	49.3	-17	-17.1	-51
1ARA5R2	dentine	meat	rat				-37.5		37.5	52.4					0.04	6.2	0.02
1AG1CR1	dentine	plant	guinea pig		5.5		-65.6		30.4	38.4	-16.3	-16.5	-74.8		0.04	6.4	0
1AGB1B2	dentine	plant	guinea pig				-63.6		32.4	40.4					0.05	6.41	0.01
1AGB1G1	dentine	plant	guinea pig		5.9			-59.6	36.4	44.4	-15.9	-16.1	-70
1AGB1G2	dentine	plant	guinea pig				-69.2		26.8	34.8					0.06	6.43	0.03
1ARB1R2	dentine	plant	rat				-47.3		48.7	56.7					0.03	6.29	0.06

## Sheet: T3.diets
sample name	diet	δ18O (‰)	δ18O (‰) SD	weight % O	weight % O SD	δ2Hn -Cr (‰)	δ2H -glassy C (‰)	δ2H -glassy C SD (‰)	fex	weight % H	weight % H SD
guinea pig supplier non-lipid diet	supplier	24.6	0	40.6358	0.293847	-85.5	-86.8	0.5	0.03	5.68	0.06
rat supplier non-lipid diet	supplier	25.3	0.1	40.9221	0.927698	-66.2	-68.9	0.6	0.03	5.79	0.02
quail supplier non-lipid diet	supplier	26.2	0.3	42.1181	0.409836	-58	-58.4	2.7	0.04	5.64	0.11
quail supplier whole diet	supplier	26	0.1	41.0684	0.0539999	-64.3	-65.5	0.4	0.03	5.87	0.02
guinea pig supplier whole diet	supplier	24.6	0.1	39.7564	0.112105	-91.3	-89.5	1.3	0.03	5.93	0.04
rat supplier whole diet	supplier	25.4	0	40.0791	0.138917	-76.6	-77.2	0.3	0.02	6.19	0.07
insect non-lipid diet	insect	23.8	0	40.1876	0.143827	-77.1	-80.7	2.7	0.04	5.62	0.08
insect whole diet	insect	23.7	0.4	38.4135	0.489452	-94.8	-95.8	1.9	0.04	6.19	0.01
meat non-lipid diet	meat	23.1	0.2	36.8665	2.6334	-75	-78.7	1.1	0.04	5.51	0.09
meat whole diet	meat	23.2	0.4	37.9268	0.130465	-89.9	-92	1.4	0.04	5.91	0.05
plant non-lipid diet	plant	21.8	0	38.8363	0.856721	-96	-98.1	1	0.03	5.54	0.29
plant whole diet	plant	22	0.2	37.6908	0.202811	-103.6	-103.6	1.6	0.02	5.95	0.11

## Sheet: T4.feathers
sample name	tissue	animal	δ2Hn -Cr (‰)	δ2H -glassy C (‰)	δ2H -glassy C SD (‰)	fex	weight % H	weight % H SD
A1QA4B1	feather	quail	-91.4	-102.1	0.1	0.05	6.19	0
1AQA4B2	feather	quail	-79.9	-89	0.9	0.05	6.37	0
1AQA4G1	feather	quail	-86.8	-97	1.1	0.06	6.1	0.05
1AQA4G2	feather	quail	-90.9	-102.1	0.6	0.05	6.29	0.05
1AQA4R1	feather	quail	-89	-100	1.6	0.05	6.15	0.05
1AQA4R2	feather	quail	-63.4	-76	4.9	0.03	6.38	0.04
1AQA5B1	feather	quail	-75	-85.4	3.1	0.05	6.39	0.08
1AQA5B2	feather	quail	-75.3	-85.6	0.6	0.05	6.39	0.01
1AQA5G1	feather	quail	-71.8	-83.2	0.4	0.04	6.35	0.08
1AQA5G2	feather	quail	-83	-94.4	1.3	0.05	6.18	0.16
1AQA5R1	feather	quail	-89.8	-98.4	0.7	0.04	6.29	0.01
1AQA5R2	feather	quail	-81.4	-91	1.5	0.05	6.15	0.02
1AQB1B1	feather	quail	-91.3	-101.8	0	0.05	6.29	0.03
1AQB1B2	feather	quail	-83.4	-95.6	0.3	0.05	6.36	0.1
1AQB1G1	feather	quail	-89.3	-99.2	0.8	0.05	6.13	0.09
1AQB1G2	feather	quail	-87	-95.6	1	0.06	6.35	0.1
1AQB1R1	feather	quail	-90.9	-101.1	1	0.05	6.14	0.03
1AQB1R2	feather	quail	-91.4	-101.4	1.7	0.05	6.31	0.04

## Sheet: T5.δ2H-nonexch
sample name	tissue	δ2H-Cr (‰) water A=155.2 ‰	δ2H-Cr (‰) water B=-224.7 ‰	fex	δ2Hn -Cr (‰)
1AGB1B1	muscle	-95.753	-120.321	0.0646686	-113.104
1AGB1G1	muscle	-95.6325	-120.561	0.0656184	-113.248
1AGB1G2	muscle	-93.1261	-119.624	0.0697489	-111.745
1AGB2R1	muscle	-83.9618	-111.031	0.0712542	-102.31
1AGB3B1	muscle	-79.9003	-105.008	0.066089	-96.5374
1AGB3B2	muscle	-79.9188	-108.402	0.0749759	-98.9758
1AGB3G1	muscle	-81.9899	-106.315	0.0640299	-98.2161
1AGB3G2	muscle	-82.7459	-104.516	0.0573058	-97.2104
1AGB6G1	muscle	-89.727	-113.584	0.0627992	-106.139
1AGB6G2	muscle	-88.1004	-111.685	0.0620817	-104.205
1AGC1R1	muscle	-93.2445	-119.812	0.0699321	-111.925
1AGC1R2	muscle	-95.1929	-119.64	0.0643515	-112.414
1AGC2B1	muscle	-85.132	-110.967	0.0680045	-102.668
1AGC2R2	muscle	-84.6806	-109.118	0.0643255	-101.172
1AGC3R1	muscle	-77.7616	-105.098	0.071958	-95.8248
1AQA4B1	muscle	-84.4782	-109.18	0.0650206	-101.146
1AQA4B2	muscle	-85.5416	-110.224	0.0649709	-102.27
1AQA4G1	muscle	-79.7143	-107.676	0.0736018	-98.3781
1AQA4G2	muscle	-82.9307	-109.541	0.0700458	-100.867
1AQA4R1	muscle	-82.524	-109.41	0.0707702	-100.629
1AQA4R2	muscle	-81.1415	-108.505	0.0720273	-99.4859
1AQA5B1	muscle	-86.4028	-116.397	0.0789531	-107.113
1AQA5B2	muscle	-86.6721	-112.495	0.0679739	-104.312
1AQA5G1	muscle	-85.9202	-113.434	0.0724234	-104.746
1AQA5G2	muscle	-89.7289	-114.591	0.0654424	-106.88
1AQA5R1	muscle	-87.9107	-113.665	0.0677925	-105.59
1AQA5R2	muscle	-87.0284	-111.495	0.0644037	-103.703
1AQB1B2	muscle	-94.4266	-119.73	0.0666063	-112.24
1AQB1G1	muscle	-95.9628	-122.311	0.0693556	-114.68
1AQB1G2	muscle	-96.0899	-119.01	0.0603309	-112.224
1AQB1R1	muscle	-94.4371	-118.86	0.0642881	-111.588
1AQB1R2	muscle	-93.2546	-121.12	0.0733492	-112.921
1ARA4B1	muscle	-77.4642	-104.686	0.0716554	-95.4226
1ARA4B2	muscle	-78.0753	-104.37	0.0692155	-95.4222
1ARA4G1	muscle	-84.0395	-104.299	0.0533285	-97.5165
1ARA4G2	muscle	-77.4562	-105.915	0.0749113	-96.2961
1ARA4R2	muscle	-76.948	-106.235	0.0770903	-96.3393
1ARA5B1	muscle	-92.3521	-109.296	0.0446023	-103.909
1ARA5B2	muscle	-83.3616	-110.084	0.0703411	-101.412
1ARA5G1	muscle	-81.3219	-107.321	0.0684379	-98.6982
1ARA5G2	muscle	-81.9605	-107.975	0.0684763	-99.3942
1ARA5R1	muscle	-80.4696	-107.282	0.0705767	-98.3655
1ARA5R2	muscle	-83.2309	-107.969	0.0651178	-99.8384
1ARB1B1	muscle	-89.0895	-115.577	0.0697226	-107.399
1ARB1B2	muscle	-87.0245	-112.539	0.0671621	-104.464
1ARB1G1	muscle	-86.6512	-111.341	0.0649892	-103.461
1ARB1G2	muscle	-88.8795	-113.77	0.0655176	-105.992
1ARB1R1	muscle	-88.2632	-113.789	0.0671919	-105.8
1AG1CR1	dentine	-57.4041	-71.5442	0.0372207	-65.6232
1AGB1B2	dentine	-52.087	-72.0001	0.0524166	-63.5533
1AGB1G2	dentine	-56.7617	-77.8195	0.0554298	-69.2002
1AGB3B2	dentine	-35.2415	-55.3388	0.0529016	-45.8788
1AGB3G1	dentine	-33.2691	-44.0778	0.0284513	-38.7884
1AGB6G1	dentine	-56.5875	-72.7812	0.042626	-66.0171
1AGB6G2	dentine	-52.5667	-68.6719	0.0423933	-61.7645
1AGC2B1	dentine	-45.0231	-60.8797	0.041739	-53.7442
1AGC2R2	dentine	-59.4806	-82.5811	0.0608068	-73.3798
1AGC3R1	dentine	-35.6187	-48.7336	0.0345221	-42.4417
1ARA4B1	dentine	-17.9054	-35.2893	0.0457592	-26.2064
1ARA4R1	dentine	-25.6705	-38.4679	0.0336862	-31.9757
1ARA5B2	dentine	-28.367	-43.1501	0.0389131	-35.7994
1ARA5R2	dentine	-30.3711	-44.38	0.0368755	-37.4761
1ARB1R2	dentine	-41.7131	-52.2714	0.0277924	-47.3422
1AQA4B1	feather	-79.295	-97.9138	0.0490097	-91.3798
1AQA4B2	feather	-67.9806	-87.1672	0.0505043	-79.8517
1AQA4G1	feather	-72.8357	-94.7439	0.0576684	-86.7909
1AQA4G2	feather	-79.5484	-97.0055	0.045952	-90.8551
1AQA4R1	feather	-75.9963	-96.1871	0.0531478	-88.9736
1AQA4R2	feather	-56.1448	-68.7107	0.0330767	-63.3746
1AQA5B1	feather	-63.9327	-82.1671	0.0479979	-74.9809
1AQA5B2	feather	-63.4708	-82.8983	0.0511384	-75.2559
1AQA5G1	feather	-61.6265	-78.6839	0.0448997	-71.8196
1AQA5G2	feather	-71.995	-89.5028	0.0460854	-82.9712
1AQA5R1	feather	-79.1372	-95.7314	0.0436803	-89.8407
1AQA5R2	feather	-69.825	-88.4003	0.0488954	-81.3933
1AQB1B1	feather	-78.91	-98.0107	0.0502784	-91.3038
1AQB1B2	feather	-72.2795	-89.9584	0.0465358	-83.3821
1AQB1G1	feather	-78.0913	-95.4944	0.0458096	-89.2913
1AQB1G2	feather	-73.3859	-94.673	0.0560335	-86.9547
1AQB1R1	feather	-77.3896	-98.2116	0.0548091	-90.8769
1AQB1R2	feather	-79.6361	-97.7321	0.0476334	-91.3817
plant diet non-lipid	diet	-90.0601	-100.809	0.0262062	-96.0113
plant diet non-lipid	diet	-88.7959	-97.9589
plant whole diet	diet	-95.4751	-105.746	0.0249614	-103.647
plant whole diet	diet	-98.8975	-107.592
insect diet non-lipid	diet	-66.2985	-83.8367	0.0441037	-77.0868
insect diet non-lipid	diet	-67.3857	-83.3575
insect whole diet	diet	-85.4106	-100.565	0.0367838	-94.8394
insect whole diet	diet	-85.8734	-98.6671
meat diet non-lipid	diet	-66.0828	-80.361	0.0374449	-75.0339
meat diet non-lipid	diet	-66.7428	-80.9153
meat whole diet	diet	-79.6469	-96.3628	0.037428	-89.9141
meat whole diet	diet	-81.833	-93.5549
quail supplier diet non-lipid	diet	-47.771	-67.4564	0.0392892	-57.9793
quail supplier diet non-lipid	diet	-51.4363	-61.6029
quail supplier whole diet	diet	-58.8541	-67.6344	0.0313879	-64.34
quail supplier whole diet	diet	-56.0441	-71.1123
rat supplier diet non-lipid	diet	-60.1843	-70.4811	0.025306	-66.2368
rat supplier diet non-lipid	diet	-61.082	-70.0126
rat supplier whole diet	diet	-71.2987	-78.174	0.0213708	-76.6032
rat supplier whole diet	diet	-72	-81.3622
guinea pig supplier diet non-lipid	diet	-77.4095	-88.099	0.0338704	-85.4721
guinea pig supplier diet non-lipid	diet	-77.2314	-92.2766
guinea pig supplier whole diet	diet	-82.1206	-94.2144	0.0325214	-91.2689
guinea pig supplier whole diet	diet	-84.3863	-97.0022
